# Supplementary material
Source: publisher figshare collection journal article supplement (https://acs.figshare.com/ndownloader/files/5734572)
Supplement: Supplementary file 1 [file 5734572]

 
data_1a 
 
_audit_creation_method            SHELXL-97 
_chemical_name_systematic 
; 
 ? 
; 
_chemical_name_common             ? 
_chemical_melting_point           ? 
_chemical_formula_moiety          ? 
_chemical_formula_sum 
 'C98 H143 Cl3 Nd2 O50 P6' 
_chemical_formula_weight          2701.77 
 
loop_ 
 _atom_type_symbol 
 _atom_type_description 
 _atom_type_scat_dispersion_real 
 _atom_type_scat_dispersion_imag 
 _atom_type_scat_source 
 'C'  'C'   0.0033   0.0016 
 'International Tables Vol C Tables 4.2.6.8 and 6.1.1.4' 
 'H'  'H'   0.0000   0.0000 
 'International Tables Vol C Tables 4.2.6.8 and 6.1.1.4' 
 'O'  'O'   0.0106   0.0060 
 'International Tables Vol C Tables 4.2.6.8 and 6.1.1.4' 
 'P'  'P'   0.1023   0.0942 
 'International Tables Vol C Tables 4.2.6.8 and 6.1.1.4' 
 'Nd'  'Nd'  -0.1943   3.0179 
 'International Tables Vol C Tables 4.2.6.8 and 6.1.1.4' 
 'Cl'  'Cl'   0.1484   0.1585 
 'International Tables Vol C Tables 4.2.6.8 and 6.1.1.4' 
 
_symmetry_cell_setting            ? 
_symmetry_space_group_name_H-M    ? 
 
loop_ 
 _symmetry_equiv_pos_as_xyz 
 'x, y, z' 
 '-x, y, -z' 
 'x+1/2, y+1/2, z' 
 '-x+1/2, y+1/2, -z' 
 
_cell_length_a                    32.758(3) 
_cell_length_b                    10.7326(9) 
_cell_length_c                    20.0076(16) 
_cell_angle_alpha                 90.00 
_cell_angle_beta                  121.8880(10) 
_cell_angle_gamma                 90.00 
_cell_volume                      5972.7(8) 
_cell_formula_units_Z             2 
_cell_measurement_temperature     293(2) 
_cell_measurement_reflns_used     ? 
_cell_measurement_theta_min       ? 
_cell_measurement_theta_max       ? 
 
_exptl_crystal_description        ? 
_exptl_crystal_colour             ? 
_exptl_crystal_size_max           ? 
_exptl_crystal_size_mid           ? 
_exptl_crystal_size_min           ? 
_exptl_crystal_density_meas       ? 
_exptl_crystal_density_diffrn     1.502 
_exptl_crystal_density_method     'not measured' 
_exptl_crystal_F_000              2784 
_exptl_absorpt_coefficient_mu     1.096 
_exptl_absorpt_correction_type    ? 
_exptl_absorpt_correction_T_min   ? 
_exptl_absorpt_correction_T_max   ? 
_exptl_absorpt_process_details    ? 
 
_exptl_special_details 
; 
 ? 
; 
 
_diffrn_ambient_temperature       293(2) 
_diffrn_radiation_wavelength      0.71073 
_diffrn_radiation_type            MoK\a 
_diffrn_radiation_source          'fine-focus sealed tube' 
_diffrn_radiation_monochromator   graphite 
_diffrn_measurement_device_type   ? 
_diffrn_measurement_method        ? 
_diffrn_detector_area_resol_mean  ? 
_diffrn_standards_number          ? 
_diffrn_standards_interval_count  ? 
_diffrn_standards_interval_time   ? 
_diffrn_standards_decay_%         ? 
_diffrn_reflns_number             25543 
_diffrn_reflns_av_R_equivalents   0.0946 
_diffrn_reflns_av_sigmaI/netI     0.1429 
_diffrn_reflns_limit_h_min        -37 
_diffrn_reflns_limit_h_max        38 
_diffrn_reflns_limit_k_min        -12 
_diffrn_reflns_limit_k_max        12 
_diffrn_reflns_limit_l_min        -23 
_diffrn_reflns_limit_l_max        23 
_diffrn_reflns_theta_min          1.46 
_diffrn_reflns_theta_max          25.04 
_reflns_number_total              10428 
_reflns_number_gt                 6024 
_reflns_threshold_expression      >2sigma(I) 
 
_computing_data_collection        ? 
_computing_cell_refinement        ? 
_computing_data_reduction         ? 
_computing_structure_solution     'SHELXS-97 (Sheldrick, 1990)' 
_computing_structure_refinement   'SHELXL-97 (Sheldrick, 1997)' 
_computing_molecular_graphics     ? 
_computing_publication_material   ? 
 
_refine_special_details 
; 
 Refinement of F^2^ against ALL reflections.  The weighted R-factor wR and 
 goodness of fit S are based on F^2^, conventional R-factors R are based 
 on F, with F set to zero for negative F^2^. The threshold expression of 
 F^2^ > 2sigma(F^2^) is used only for calculating R-factors(gt) etc. and is 
 not relevant to the choice of reflections for refinement.  R-factors based 
 on F^2^ are statistically about twice as large as those based on F, and R- 
 factors based on ALL data will be even larger. 
; 
 
_refine_ls_structure_factor_coef  Fsqd  
_refine_ls_matrix_type            full 
_refine_ls_weighting_scheme       calc  
_refine_ls_weighting_details 
 'calc w=1/[\s^2^(Fo^2^)+(0.1388P)^2^+15.2928P] where P=(Fo^2^+2Fc^2^)/3' 
_atom_sites_solution_primary      direct 
_atom_sites_solution_secondary    difmap 
_atom_sites_solution_hydrogens    geom 
_refine_ls_hydrogen_treatment     mixed 
_refine_ls_extinction_method      none 
_refine_ls_extinction_coef        ? 
_refine_ls_abs_structure_details 
 'Flack H D (1983), Acta Cryst. A39, 876-881' 
_refine_ls_abs_structure_Flack    0.06(4) 
_refine_ls_number_reflns          10428 
_refine_ls_number_parameters      531 
_refine_ls_number_restraints      30 
_refine_ls_R_factor_all           0.1581 
_refine_ls_R_factor_gt            0.0841 
_refine_ls_wR_factor_ref          0.2525 
_refine_ls_wR_factor_gt           0.2081 
_refine_ls_goodness_of_fit_ref    1.032 
_refine_ls_restrained_S_all       1.067 
_refine_ls_shift/su_max           1.197 
_refine_ls_shift/su_mean          0.056 
 
loop_ 
 _atom_site_label 
 _atom_site_type_symbol 
 _atom_site_fract_x 
 _atom_site_fract_y 
 _atom_site_fract_z 
 _atom_site_U_iso_or_equiv 
 _atom_site_adp_type 
 _atom_site_occupancy 
 _atom_site_symmetry_multiplicity 
 _atom_site_calc_flag 
 _atom_site_refinement_flags 
 _atom_site_disorder_assembly 
 _atom_site_disorder_group 
Nd1 Nd 0.0000 0.16564(9) 0.0000 0.0294(3) Uani 1 2 d S . . 
Nd2 Nd 0.0000 -0.33492(11) 0.0000 0.0436(4) Uani 1 2 d S . . 
P1 P 0.05639(10) -0.0840(6) -0.05786(19) 0.0312(7) Uani 1 1 d . . . 
P2 P 0.40583(11) -0.0864(6) -0.0616(2) 0.0366(8) Uani 1 1 d . . . 
P3 P -0.08580(18) -0.0313(6) -0.3180(3) 0.0679(16) Uani 1 1 d . . . 
O1 O 0.0436(3) -0.0773(14) -0.1462(5) 0.043(2) Uani 1 1 d . . . 
O2 O 0.0360 -0.2005 -0.0460 0.053 Uani 1 1 d . . . 
O3 O 0.0400(3) 0.0342(10) -0.0396(6) 0.039(3) Uani 1 1 d . . . 
O4 O 0.4323 -0.2085 -0.0452 0.045 Uani 1 1 d . . . 
O5 O 0.3607(4) -0.0984(15) -0.1502(6) 0.056(3) Uani 1 1 d . . . 
O6 O 0.4335(5) 0.0288(10) -0.0526(8) 0.062(4) Uani 1 1 d . . . 
O7 O 0.3410(5) -0.2672(18) 0.1915(11) 0.1046(18) Uani 1 1 d D . . 
O8 O 0.3551(6) -0.4943(17) 0.2833(11) 0.1046(18) Uani 1 1 d D . . 
O9 O 0.3068(6) -0.4001(17) 0.3545(11) 0.1046(18) Uani 1 1 d D . . 
O10 O 0.2682(6) -0.1505(16) 0.3626(10) 0.1046(18) Uani 1 1 d D . . 
O11 O 0.2676(6) 0.1058(17) 0.3171(11) 0.1046(18) Uani 1 1 d D . . 
O12 O 0.2876(6) 0.0801(18) 0.1977(10) 0.1046(18) Uani 1 1 d D . . 
O13 O -0.0676(5) -0.2339(15) -0.1258(11) 0.080(6) Uani 1 1 d D . . 
O14 O -0.0643(5) 0.0520(12) -0.1235(7) 0.045(3) Uani 1 1 d . . . 
O15 O -0.0082(6) -0.4484(12) -0.1200(10) 0.064(5) Uani 1 1 d . . . 
O16 O -0.0113(5) 0.2817(13) -0.1231(8) 0.052(4) Uani 1 1 d D . . 
O17 O -0.0910(9) 0.1086(17) -0.3499(11) 0.133(8) Uani 1 1 d . . . 
O18 O -0.0500(4) -0.0391(14) -0.2324(7) 0.078(5) Uani 1 1 d . . . 
O19 O -0.1361(4) -0.070(2) -0.3417(8) 0.115(7) Uani 1 1 d . . . 
O20 O -0.0474(6) -0.4633(19) -0.6183(9) 0.130(4) Uani 1 1 d D . . 
O21 O -0.0153(6) -0.6694(19) -0.6727(10) 0.130(4) Uani 1 1 d D . . 
O22 O 0.0437(6) -0.751(2) -0.4878(11) 0.130(4) Uani 1 1 d D . . 
O23 O -0.277(3) -0.205(7) -0.579(4) 0.25(3) Uiso 0.50 1 d P . . 
Cl2 Cl -0.209(2) -0.015(6) -0.481(3) 0.23(2) Uiso 0.25 1 d P . . 
C1 C 0.2735(5) -0.1408(13) 0.1194(9) 0.036(4) Uani 1 1 d . . . 
C2 C 0.2943 -0.2535 0.1566 0.059 Uani 1 1 d D . . 
C3 C 0.2640(5) -0.3482(17) 0.1583(9) 0.043(4) Uani 1 1 d . . . 
H3A H 0.2773 -0.4232 0.1840 0.052 Uiso 1 1 calc R . . 
C4 C 0.2146(5) -0.3282(17) 0.1217(8) 0.043(3) Uani 1 1 d . . . 
H4A H 0.1955 -0.3905 0.1236 0.051 Uiso 1 1 calc R . . 
C5 C 0.1928(5) -0.2157(12) 0.0817(9) 0.030(3) Uani 1 1 d . . . 
C6 C 0.1418(5) -0.2014(13) 0.0407(9) 0.031(3) Uani 1 1 d . . . 
H6A H 0.1226 -0.2640 0.0420 0.037 Uiso 1 1 calc R . . 
C7 C 0.1212(4) -0.091(3) -0.0014(8) 0.034(4) Uani 1 1 d . . . 
C8 C 0.1500(6) -0.0064(14) -0.0067(9) 0.031(4) Uani 1 1 d . . . 
H8A H 0.1354 0.0628 -0.0386 0.037 Uiso 1 1 calc R . . 
C9 C 0.1969(6) -0.0149(14) 0.0300(9) 0.035(4) Uani 1 1 d . . . 
H9A H 0.2147 0.0496 0.0265 0.041 Uiso 1 1 calc R . . 
C10 C 0.2207(5) -0.1233(11) 0.0754(9) 0.027(3) Uani 1 1 d . . . 
C11 C 0.3046(5) -0.0395(12) 0.1163(8) 0.028(3) Uani 1 1 d . . . 
C12 C 0.3120(9) 0.0738(15) 0.1665(12) 0.062(6) Uani 1 1 d D . . 
C13 C 0.3426(6) 0.161(2) 0.1633(9) 0.054(5) Uani 1 1 d . . . 
H13A H 0.3463 0.2363 0.1892 0.065 Uiso 1 1 calc R . . 
C14 C 0.3677(5) 0.1492(13) 0.1267(9) 0.036(4) Uani 1 1 d . . . 
H14A H 0.3889 0.2113 0.1315 0.043 Uiso 1 1 calc R . . 
C15 C 0.3611(5) 0.0408(13) 0.0813(8) 0.029(3) Uani 1 1 d . . . 
C16 C 0.3862(5) 0.0245(14) 0.0399(9) 0.035(4) Uani 1 1 d . . . 
H16A H 0.4086 0.0832 0.0452 0.042 Uiso 1 1 calc R . . 
C17 C 0.3770(5) -0.074(3) -0.0054(9) 0.038(4) Uani 1 1 d . . . 
C18 C 0.3430(6) -0.1666(13) -0.0166(10) 0.032(4) Uani 1 1 d . . . 
H18A H 0.3362 -0.2326 -0.0511 0.038 Uiso 1 1 calc R . . 
C19 C 0.3202(5) -0.1567(13) 0.0247(9) 0.032(4) Uani 1 1 d . . . 
H19A H 0.2992 -0.2188 0.0203 0.039 Uiso 1 1 calc R . . 
C20 C 0.3287(5) -0.0528(10) 0.0737(9) 0.030(4) Uani 1 1 d . . . 
C21 C 0.3582(9) -0.378(2) 0.1917(14) 0.1046(18) Uani 1 1 d D . . 
H21A H 0.3795 -0.3675 0.1720 0.125 Uiso 1 1 calc R . . 
H21B H 0.3315 -0.4287 0.1537 0.125 Uiso 1 1 calc R . . 
C22 C 0.3856(8) -0.453(3) 0.2680(14) 0.1046(18) Uani 1 1 d D . . 
H22A H 0.4026 -0.5214 0.2617 0.125 Uiso 1 1 calc R . . 
H22B H 0.4089 -0.4003 0.3106 0.125 Uiso 1 1 calc R . . 
C23 C 0.3719(8) -0.510(3) 0.3575(13) 0.1046(18) Uani 1 1 d D . . 
H23A H 0.3970 -0.4490 0.3868 0.125 Uiso 1 1 calc R . . 
H23B H 0.3866 -0.5919 0.3726 0.125 Uiso 1 1 calc R . . 
C24 C 0.3342(8) -0.499(2) 0.3828(16) 0.1046(18) Uani 1 1 d D . . 
H24A H 0.3140 -0.5730 0.3652 0.125 Uiso 1 1 calc R . . 
H24B H 0.3512 -0.4971 0.4398 0.125 Uiso 1 1 calc R . . 
C25 C 0.3337(8) -0.3030(18) 0.3832(16) 0.1046(18) Uani 1 1 d D . . 
H25A H 0.3580 -0.3029 0.3695 0.125 Uiso 1 1 calc R . . 
H25B H 0.3497 -0.3028 0.4402 0.125 Uiso 1 1 calc R . . 
C26 C 0.3016(8) -0.189(2) 0.3488(16) 0.1046(18) Uani 1 1 d D . . 
H26A H 0.3233 -0.1194 0.3620 0.125 Uiso 1 1 calc R . . 
H26B H 0.2852 -0.1992 0.2922 0.125 Uiso 1 1 calc R . . 
C27 C 0.2307(7) -0.071(2) 0.3172(13) 0.1046(18) Uani 1 1 d D . . 
H27A H 0.2030 -0.0969 0.3194 0.125 Uiso 1 1 calc R . . 
H27B H 0.2221 -0.0778 0.2629 0.125 Uiso 1 1 calc R . . 
C28 C 0.2414(9) 0.065(2) 0.3421(16) 0.1046(18) Uani 1 1 d D . . 
H28A H 0.2117 0.1120 0.3193 0.125 Uiso 1 1 calc R . . 
H28B H 0.2582 0.0716 0.3989 0.125 Uiso 1 1 calc R . . 
C29 C 0.2459(8) 0.168(3) 0.2512(13) 0.1046(18) Uani 1 1 d D . . 
H29A H 0.2368 0.2496 0.2600 0.125 Uiso 1 1 calc R . . 
H29B H 0.2168 0.1244 0.2130 0.125 Uiso 1 1 calc R . . 
C30 C 0.2787(8) 0.182(2) 0.2196(15) 0.1046(18) Uani 1 1 d D . . 
H30A H 0.2639 0.2390 0.1753 0.125 Uiso 1 1 calc R . . 
H30B H 0.3088 0.2187 0.2602 0.125 Uiso 1 1 calc R . . 
C31 C -0.1097(9) -0.278(3) -0.1890(15) 0.129(12) Uani 1 1 d D . . 
H31A H -0.1262 -0.2110 -0.2255 0.194 Uiso 1 1 calc R . . 
H31B H -0.1296 -0.3105 -0.1712 0.194 Uiso 1 1 calc R . . 
H31C H -0.1027 -0.3426 -0.2145 0.194 Uiso 1 1 calc R . . 
C32 C -0.1153(6) 0.0587(18) -0.1541(11) 0.055(5) Uani 1 1 d . . . 
H32A H -0.1324 0.0092 -0.2010 0.082 Uiso 1 1 calc R . . 
H32B H -0.1258 0.1438 -0.1662 0.082 Uiso 1 1 calc R . . 
H32C H -0.1216 0.0277 -0.1154 0.082 Uiso 1 1 calc R . . 
C33 C -0.0137(8) -0.404(2) -0.1959(15) 0.084(7) Uani 1 1 d . . . 
H33A H -0.0160 -0.4750 -0.2271 0.127 Uiso 1 1 calc R . . 
H33B H 0.0138 -0.3552 -0.1844 0.127 Uiso 1 1 calc R . . 
H33C H -0.0422 -0.3546 -0.2244 0.127 Uiso 1 1 calc R . . 
C34 C 0.0161(7) 0.2621(16) -0.1573(12) 0.056(5) Uani 1 1 d D . . 
H34A H 0.0049 0.3162 -0.2018 0.083 Uiso 1 1 calc R . . 
H34B H 0.0129 0.1770 -0.1741 0.083 Uiso 1 1 calc R . . 
H34C H 0.0493 0.2797 -0.1193 0.083 Uiso 1 1 calc R . . 
C35 C -0.1056(3) -0.4035(11) -0.5887(6) 0.065(6) Uani 1 1 d G . . 
H35A H -0.1279 -0.4519 -0.6309 0.078 Uiso 1 1 calc R . . 
C36 C -0.0586(4) -0.3952(11) -0.5710(6) 0.054(5) Uani 1 1 d GD . . 
C37 C -0.0253(3) -0.3229(11) -0.5079(6) 0.048(4) Uani 1 1 d GD . . 
C38 C -0.0390(3) -0.2588(10) -0.4625(5) 0.038(4) Uani 1 1 d G . . 
C43 C -0.0861(4) -0.2672(11) -0.4802(6) 0.049(4) Uani 1 1 d G . . 
C44 C -0.1194(3) -0.3395(13) -0.5433(7) 0.065(5) Uani 1 1 d G . . 
H44A H -0.1508 -0.3450 -0.5551 0.078 Uiso 1 1 calc R . . 
C39 C -0.0057(6) -0.1820(16) -0.3984(10) 0.052(5) Uani 1 1 d . . . 
H39A H 0.0258 -0.1763 -0.3862 0.062 Uiso 1 1 calc R . . 
C40 C -0.0188(6) -0.1189(19) -0.3561(10) 0.064(7) Uani 1 1 d . . . 
H40A H 0.0038 -0.0699 -0.3145 0.077 Uiso 1 1 calc R . . 
C41 C -0.0675(6) -0.1242(18) -0.3729(10) 0.064(7) Uani 1 1 d . . . 
C42 C -0.0994(6) -0.2033(18) -0.4332(10) 0.057(5) Uani 1 1 d . . . 
H42A H -0.1302 -0.2142 -0.4426 0.068 Uiso 1 1 calc R . . 
C45 C -0.0751(8) -0.540(3) -0.6721(14) 0.130(4) Uani 1 1 d D . . 
H45A H -0.1038 -0.4969 -0.7118 0.155 Uiso 1 1 calc R . . 
H45B H -0.0850 -0.6044 -0.6493 0.155 Uiso 1 1 calc R . . 
C46 C -0.0519(8) -0.599(3) -0.7098(13) 0.130(4) Uani 1 1 d D . . 
H46A H -0.0765 -0.6480 -0.7535 0.155 Uiso 1 1 calc R . . 
H46B H -0.0431 -0.5328 -0.7325 0.155 Uiso 1 1 calc R . . 
C47 C 0.0261(7) -0.641(2) -0.6158(13) 0.130(4) Uani 1 1 d D . . 
H47A H 0.0236 -0.5584 -0.5991 0.155 Uiso 1 1 calc R . . 
H47B H 0.0465 -0.6344 -0.6373 0.155 Uiso 1 1 calc R . . 
C48 C 0.0551(9) -0.723(3) -0.5380(13) 0.130(4) Uani 1 1 d D . . 
H48A H 0.0606 -0.8020 -0.5553 0.155 Uiso 1 1 calc R . . 
H48B H 0.0863 -0.6832 -0.5076 0.155 Uiso 1 1 calc R . . 
C49 C 0.0162(8) -0.851(3) -0.5174(14) 0.130(4) Uani 1 1 d D . . 
H49A H 0.0357 -0.9256 -0.5022 0.155 Uiso 1 1 calc R . . 
H49B H -0.0030 -0.8461 -0.5744 0.155 Uiso 1 1 calc R . . 
Cl1 Cl -0.1110(3) -0.6734(8) -0.2706(4) 0.110(2) Uani 1 1 d . . . 
O25 O -0.391(6) 0.029(14) -0.631(9) 0.23(6) Uiso 0.25 1 d P . . 
O24 O -0.356(9) 0.12(2) -0.654(14) 0.34(13) Uiso 0.25 1 d P . . 
 
loop_ 
 _atom_site_aniso_label 
 _atom_site_aniso_U_11 
 _atom_site_aniso_U_22 
 _atom_site_aniso_U_33 
 _atom_site_aniso_U_23 
 _atom_site_aniso_U_13 
 _atom_site_aniso_U_12 
Nd1 0.0269(6) 0.0197(6) 0.0549(8) 0.000 0.0306(6) 0.000 
Nd2 0.0402(8) 0.0189(7) 0.0954(11) 0.000 0.0520(8) 0.000 
P1 0.0236(15) 0.0248(15) 0.055(2) 0.001(3) 0.0276(15) -0.001(3) 
P2 0.0312(17) 0.0224(15) 0.068(2) 0.001(3) 0.0344(17) 0.002(3) 
P3 0.039(3) 0.099(4) 0.066(3) -0.011(3) 0.028(3) 0.014(2) 
O1 0.038(5) 0.054(6) 0.042(5) -0.013(7) 0.025(4) 0.001(8) 
O2 0.041 0.025 0.110 0.002 0.052 -0.019 
O3 0.024(5) 0.046(6) 0.060(7) -0.012(5) 0.031(5) -0.008(5) 
O4 0.039 0.046 0.073 0.007 0.045 0.025 
O5 0.035(5) 0.055(8) 0.077(7) -0.010(8) 0.028(5) 0.001(7) 
O6 0.078(9) 0.029(6) 0.120(11) -0.024(7) 0.080(9) -0.014(6) 
O7 0.069(4) 0.117(5) 0.120(4) 0.010(4) 0.045(3) 0.012(3) 
O8 0.069(4) 0.117(5) 0.120(4) 0.010(4) 0.045(3) 0.012(3) 
O9 0.069(4) 0.117(5) 0.120(4) 0.010(4) 0.045(3) 0.012(3) 
O10 0.069(4) 0.117(5) 0.120(4) 0.010(4) 0.045(3) 0.012(3) 
O11 0.069(4) 0.117(5) 0.120(4) 0.010(4) 0.045(3) 0.012(3) 
O12 0.069(4) 0.117(5) 0.120(4) 0.010(4) 0.045(3) 0.012(3) 
O13 0.024(8) 0.066(11) 0.128(14) 0.008(10) 0.026(9) -0.009(7) 
O14 0.043(8) 0.041(8) 0.056(8) -0.018(6) 0.029(7) -0.010(6) 
O15 0.103(13) 0.029(8) 0.120(13) -0.012(8) 0.100(11) -0.006(8) 
O16 0.039(8) 0.058(10) 0.067(9) 0.001(7) 0.034(7) 0.002(7) 
O17 0.20(2) 0.086(13) 0.112(14) 0.013(11) 0.087(15) 0.028(14) 
O18 0.050(8) 0.146(16) 0.044(7) -0.028(7) 0.028(6) 0.013(8) 
O19 0.042(7) 0.21(2) 0.096(10) -0.089(14) 0.042(7) -0.042(12) 
O20 0.067(5) 0.182(9) 0.089(6) -0.065(6) 0.007(4) 0.009(5) 
O21 0.067(5) 0.182(9) 0.089(6) -0.065(6) 0.007(4) 0.009(5) 
O22 0.067(5) 0.182(9) 0.089(6) -0.065(6) 0.007(4) 0.009(5) 
C1 0.015(7) 0.026(7) 0.066(11) 0.008(7) 0.021(7) -0.003(6) 
C2 0.034 0.026 0.060 0.007 -0.015 0.013 
C3 0.024(7) 0.040(10) 0.062(9) -0.006(9) 0.020(7) -0.005(8) 
C4 0.043(8) 0.032(8) 0.054(9) 0.013(10) 0.025(7) 0.004(9) 
C5 0.028(8) 0.018(7) 0.053(9) -0.005(6) 0.028(7) -0.004(6) 
C6 0.027(8) 0.020(7) 0.052(10) -0.005(6) 0.025(8) -0.010(6) 
C7 0.019(6) 0.037(9) 0.055(9) 0.023(12) 0.026(7) 0.021(11) 
C8 0.028(9) 0.029(9) 0.044(10) 0.005(7) 0.025(8) 0.010(7) 
C9 0.039(10) 0.038(9) 0.035(9) 0.005(7) 0.025(8) -0.010(7) 
C10 0.022(7) 0.024(8) 0.046(9) 0.001(6) 0.027(7) 0.006(5) 
C11 0.021(7) 0.020(7) 0.040(8) -0.001(5) 0.014(7) -0.007(5) 
C12 0.130(19) 0.027(9) 0.091(15) 0.014(9) 0.101(15) 0.016(11) 
C13 0.047(9) 0.051(10) 0.057(10) -0.032(11) 0.022(8) 0.019(11) 
C14 0.031(7) 0.018(8) 0.066(9) -0.001(7) 0.030(7) -0.014(6) 
C15 0.018(7) 0.031(8) 0.044(9) -0.002(6) 0.021(7) 0.000(6) 
C16 0.026(8) 0.033(9) 0.063(10) -0.009(8) 0.034(8) -0.013(7) 
C17 0.041(8) 0.026(10) 0.065(10) 0.005(12) 0.041(8) -0.003(12) 
C18 0.033(9) 0.009(7) 0.072(11) -0.017(7) 0.040(9) -0.005(6) 
C19 0.044(10) 0.017(8) 0.051(10) 0.000(7) 0.035(9) -0.001(6) 
C20 0.024(7) 0.006(9) 0.061(10) -0.005(5) 0.023(7) -0.003(5) 
C21 0.069(4) 0.117(5) 0.120(4) 0.010(4) 0.045(3) 0.012(3) 
C22 0.069(4) 0.117(5) 0.120(4) 0.010(4) 0.045(3) 0.012(3) 
C23 0.069(4) 0.117(5) 0.120(4) 0.010(4) 0.045(3) 0.012(3) 
C24 0.069(4) 0.117(5) 0.120(4) 0.010(4) 0.045(3) 0.012(3) 
C25 0.069(4) 0.117(5) 0.120(4) 0.010(4) 0.045(3) 0.012(3) 
C26 0.069(4) 0.117(5) 0.120(4) 0.010(4) 0.045(3) 0.012(3) 
C27 0.069(4) 0.117(5) 0.120(4) 0.010(4) 0.045(3) 0.012(3) 
C28 0.069(4) 0.117(5) 0.120(4) 0.010(4) 0.045(3) 0.012(3) 
C29 0.069(4) 0.117(5) 0.120(4) 0.010(4) 0.045(3) 0.012(3) 
C30 0.069(4) 0.117(5) 0.120(4) 0.010(4) 0.045(3) 0.012(3) 
C31 0.12(3) 0.12(2) 0.19(4) 0.02(2) 0.11(3) -0.02(2) 
C32 0.043(11) 0.065(13) 0.060(12) 0.018(9) 0.029(10) 0.001(9) 
C33 0.056(14) 0.076(16) 0.13(2) -0.008(15) 0.057(15) 0.018(12) 
C34 0.065(13) 0.037(9) 0.090(15) -0.015(9) 0.058(12) -0.026(9) 
C35 0.029(10) 0.075(13) 0.063(12) -0.015(10) 0.006(9) -0.030(9) 
C36 0.042(11) 0.068(12) 0.043(10) 0.001(9) 0.016(9) 0.019(9) 
C37 0.030(8) 0.056(10) 0.033(8) 0.010(10) 0.000(7) -0.009(9) 
C38 0.026(8) 0.052(10) 0.030(9) 0.002(7) 0.010(7) -0.003(7) 
C43 0.034(9) 0.064(11) 0.052(11) -0.004(9) 0.025(9) -0.004(8) 
C44 0.045(10) 0.093(14) 0.050(10) -0.023(13) 0.022(8) -0.030(12) 
C39 0.033(9) 0.055(11) 0.058(11) 0.010(9) 0.017(9) 0.001(8) 
C40 0.045(10) 0.11(2) 0.041(9) -0.038(10) 0.023(9) -0.031(10) 
C41 0.029(9) 0.11(2) 0.050(10) -0.040(10) 0.019(8) -0.014(9) 
C42 0.028(9) 0.086(14) 0.059(12) 0.000(10) 0.024(9) -0.002(9) 
C45 0.067(5) 0.182(9) 0.089(6) -0.065(6) 0.007(4) 0.009(5) 
C46 0.067(5) 0.182(9) 0.089(6) -0.065(6) 0.007(4) 0.009(5) 
C47 0.067(5) 0.182(9) 0.089(6) -0.065(6) 0.007(4) 0.009(5) 
C48 0.067(5) 0.182(9) 0.089(6) -0.065(6) 0.007(4) 0.009(5) 
C49 0.067(5) 0.182(9) 0.089(6) -0.065(6) 0.007(4) 0.009(5) 
Cl1 0.086(5) 0.145(6) 0.096(5) 0.022(4) 0.047(4) 0.038(4) 
 
_geom_special_details 
; 
 All esds (except the esd in the dihedral angle between two l.s. planes) 
 are estimated using the full covariance matrix.  The cell esds are taken 
 into account individually in the estimation of esds in distances, angles 
 and torsion angles; correlations between esds in cell parameters are only 
 used when they are defined by crystal symmetry.  An approximate (isotropic) 
 treatment of cell esds is used for estimating esds involving l.s. planes. 
; 
 
loop_ 
 _geom_bond_atom_site_label_1 
 _geom_bond_atom_site_label_2 
 _geom_bond_distance 
 _geom_bond_site_symmetry_2 
 _geom_bond_publ_flag 
Nd1 O3 2.330(10) 2 ? 
Nd1 O3 2.330(10) . ? 
Nd1 O4 2.3320(6) 3_455 ? 
Nd1 O4 2.3320(6) 4 ? 
Nd1 O14 2.555(11) . ? 
Nd1 O14 2.555(11) 2 ? 
Nd1 O16 2.607(14) 2 ? 
Nd1 O16 2.607(14) . ? 
Nd2 O2 2.3388(7) . ? 
Nd2 O2 2.3388(7) 2 ? 
Nd2 O6 2.360(12) 3_445 ? 
Nd2 O6 2.360(12) 4_545 ? 
Nd2 O13 2.555(16) 2 ? 
Nd2 O13 2.555(16) . ? 
Nd2 O15 2.576(14) . ? 
Nd2 O15 2.576(14) 2 ? 
P1 O2 1.494(5) . ? 
P1 O3 1.497(11) . ? 
P1 O1 1.589(9) . ? 
P1 C7 1.805(12) . ? 
P2 O6 1.486(12) . ? 
P2 O4 1.509(6) . ? 
P2 O5 1.605(11) . ? 
P2 C17 1.817(15) . ? 
P3 O18 1.481(13) . ? 
P3 O19 1.510(14) . ? 
P3 O17 1.605(19) . ? 
P3 C41 1.804(17) . ? 
O4 Nd1 2.3320(6) 3_545 ? 
O6 Nd2 2.360(12) 3 ? 
O7 C2 1.312(13) . ? 
O7 C21 1.314(17) . ? 
O8 C22 1.270(17) . ? 
O8 C23 1.295(16) . ? 
O9 C25 1.287(17) . ? 
O9 C24 1.314(17) . ? 
O10 C26 1.329(16) . ? 
O10 C27 1.373(16) . ? 
O11 C28 1.279(17) . ? 
O11 C29 1.303(16) . ? 
O12 C12 1.248(15) . ? 
O12 C30 1.268(17) . ? 
O13 C31 1.371(18) . ? 
O14 C32 1.45(2) . ? 
O15 C33 1.51(3) . ? 
O16 C34 1.400(15) . ? 
O20 C45 1.278(17) . ? 
O20 C36 1.390(13) . ? 
O21 C47 1.263(16) . ? 
O21 C46 1.269(17) . ? 
O22 C48 1.279(18) . ? 
O22 C49 1.320(18) . ? 
C1 C2 1.394(14) . ? 
C1 C10 1.482(19) . ? 
C1 C11 1.513(18) . ? 
C2 C3 1.433(16) . ? 
C3 C4 1.40(2) . ? 
C4 C5 1.42(2) . ? 
C5 C10 1.398(18) . ? 
C5 C6 1.429(19) . ? 
C6 C7 1.40(3) . ? 
C7 C8 1.35(3) . ? 
C8 C9 1.31(2) . ? 
C9 C10 1.428(18) . ? 
C11 C20 1.44(2) . ? 
C11 C12 1.51(2) . ? 
C12 C13 1.40(3) . ? 
C13 C14 1.37(2) . ? 
C14 C15 1.421(19) . ? 
C15 C20 1.411(17) . ? 
C15 C16 1.453(19) . ? 
C16 C17 1.32(3) . ? 
C17 C18 1.42(3) . ? 
C18 C19 1.38(2) . ? 
C19 C20 1.412(18) . ? 
C21 C22 1.528(18) . ? 
C23 C24 1.565(18) . ? 
C25 C26 1.517(17) . ? 
C27 C28 1.517(18) . ? 
C29 C30 1.517(18) . ? 
C35 C36 1.3900 . ? 
C35 C44 1.3900 . ? 
C36 C37 1.3900 . ? 
C37 C38 1.3900 . ? 
C37 C37 1.513(15) 2_554 ? 
C38 C43 1.3900 . ? 
C38 C39 1.427(19) . ? 
C43 C44 1.3900 . ? 
C43 C42 1.41(2) . ? 
C39 C40 1.32(2) . ? 
C40 C41 1.45(2) . ? 
C41 C42 1.39(2) . ? 
C45 C46 1.47(3) . ? 
C47 C48 1.589(19) . ? 
C49 C49 1.55(2) 2_554 ? 
 
loop_ 
 _geom_angle_atom_site_label_1 
 _geom_angle_atom_site_label_2 
 _geom_angle_atom_site_label_3 
 _geom_angle 
 _geom_angle_site_symmetry_1 
 _geom_angle_site_symmetry_3 
 _geom_angle_publ_flag 
O3 Nd1 O3 105.5(5) 2 . ? 
O3 Nd1 O4 83.8(2) 2 3_455 ? 
O3 Nd1 O4 144.0(3) . 3_455 ? 
O3 Nd1 O4 144.0(3) 2 4 ? 
O3 Nd1 O4 83.8(2) . 4 ? 
O4 Nd1 O4 109.18(4) 3_455 4 ? 
O3 Nd1 O14 73.5(4) 2 . ? 
O3 Nd1 O14 72.9(4) . . ? 
O4 Nd1 O14 76.9(3) 3_455 . ? 
O4 Nd1 O14 141.3(3) 4 . ? 
O3 Nd1 O14 72.9(4) 2 2 ? 
O3 Nd1 O14 73.5(4) . 2 ? 
O4 Nd1 O14 141.3(3) 3_455 2 ? 
O4 Nd1 O14 76.9(3) 4 2 ? 
O14 Nd1 O14 123.0(6) . 2 ? 
O3 Nd1 O16 78.0(4) 2 2 ? 
O3 Nd1 O16 141.8(4) . 2 ? 
O4 Nd1 O16 73.8(3) 3_455 2 ? 
O4 Nd1 O16 74.1(3) 4 2 ? 
O14 Nd1 O16 140.8(4) . 2 ? 
O14 Nd1 O16 71.4(4) 2 2 ? 
O3 Nd1 O16 141.8(4) 2 . ? 
O3 Nd1 O16 78.0(4) . . ? 
O4 Nd1 O16 74.1(3) 3_455 . ? 
O4 Nd1 O16 73.8(3) 4 . ? 
O14 Nd1 O16 71.4(4) . . ? 
O14 Nd1 O16 140.8(4) 2 . ? 
O16 Nd1 O16 122.9(6) 2 . ? 
O2 Nd2 O2 103.83(5) . 2 ? 
O2 Nd2 O6 138.2(3) . 3_445 ? 
O2 Nd2 O6 91.1(3) 2 3_445 ? 
O2 Nd2 O6 91.1(3) . 4_545 ? 
O2 Nd2 O6 138.2(3) 2 4_545 ? 
O6 Nd2 O6 103.4(6) 3_445 4_545 ? 
O2 Nd2 O13 76.8(4) . 2 ? 
O2 Nd2 O13 72.9(4) 2 2 ? 
O6 Nd2 O13 144.9(5) 3_445 2 ? 
O6 Nd2 O13 73.0(5) 4_545 2 ? 
O2 Nd2 O13 72.9(4) . . ? 
O2 Nd2 O13 76.8(4) 2 . ? 
O6 Nd2 O13 73.0(5) 3_445 . ? 
O6 Nd2 O13 144.9(5) 4_545 . ? 
O13 Nd2 O13 129.8(8) 2 . ? 
O2 Nd2 O15 75.6(3) . . ? 
O2 Nd2 O15 146.4(4) 2 . ? 
O6 Nd2 O15 71.0(4) 3_445 . ? 
O6 Nd2 O15 74.9(5) 4_545 . ? 
O13 Nd2 O15 136.7(5) 2 . ? 
O13 Nd2 O15 70.9(6) . . ? 
O2 Nd2 O15 146.4(4) . 2 ? 
O2 Nd2 O15 75.6(3) 2 2 ? 
O6 Nd2 O15 74.9(5) 3_445 2 ? 
O6 Nd2 O15 71.0(4) 4_545 2 ? 
O13 Nd2 O15 70.9(6) 2 2 ? 
O13 Nd2 O15 136.7(5) . 2 ? 
O15 Nd2 O15 123.6(6) . 2 ? 
O2 P1 O3 115.0(4) . . ? 
O2 P1 O1 109.7(6) . . ? 
O3 P1 O1 108.4(7) . . ? 
O2 P1 C7 109.9(9) . . ? 
O3 P1 C7 109.8(10) . . ? 
O1 P1 C7 103.3(5) . . ? 
O6 P2 O4 116.9(5) . . ? 
O6 P2 O5 110.3(8) . . ? 
O4 P2 O5 105.0(6) . . ? 
O6 P2 C17 110.3(11) . . ? 
O4 P2 C17 110.9(9) . . ? 
O5 P2 C17 102.3(6) . . ? 
O18 P3 O19 114.4(9) . . ? 
O18 P3 O17 111.4(10) . . ? 
O19 P3 O17 105.1(13) . . ? 
O18 P3 C41 111.0(8) . . ? 
O19 P3 C41 108.4(9) . . ? 
O17 P3 C41 105.9(10) . . ? 
P1 O2 Nd2 159.93(16) . . ? 
P1 O3 Nd1 159.2(6) . . ? 
P2 O4 Nd1 155.14(16) . 3_545 ? 
P2 O6 Nd2 158.4(9) . 3 ? 
C2 O7 C21 118.9(19) . . ? 
C22 O8 C23 114(2) . . ? 
C25 O9 C24 108.2(19) . . ? 
C26 O10 C27 127.3(18) . . ? 
C28 O11 C29 117(2) . . ? 
C12 O12 C30 122.9(19) . . ? 
C31 O13 Nd2 133.5(16) . . ? 
C32 O14 Nd1 124.2(11) . . ? 
C33 O15 Nd2 133.5(11) . . ? 
C34 O16 Nd1 125.6(11) . . ? 
C45 O20 C36 126.1(19) . . ? 
C47 O21 C46 128(2) . . ? 
C48 O22 C49 104.5(19) . . ? 
C2 C1 C10 120.9(11) . . ? 
C2 C1 C11 119.7(11) . . ? 
C10 C1 C11 119.0(12) . . ? 
O7 C2 C1 119.0(10) . . ? 
O7 C2 C3 122.3(11) . . ? 
C1 C2 C3 118.6(9) . . ? 
C4 C3 C2 120.2(15) . . ? 
C3 C4 C5 121.8(15) . . ? 
C10 C5 C4 119.8(13) . . ? 
C10 C5 C6 119.6(13) . . ? 
C4 C5 C6 120.3(12) . . ? 
C7 C6 C5 118.7(13) . . ? 
C8 C7 C6 118.8(12) . . ? 
C8 C7 P1 123.9(16) . . ? 
C6 C7 P1 116.5(16) . . ? 
C9 C8 C7 124.6(15) . . ? 
C8 C9 C10 119.8(14) . . ? 
C5 C10 C9 118.2(12) . . ? 
C5 C10 C1 118.1(12) . . ? 
C9 C10 C1 123.7(12) . . ? 
C20 C11 C1 123.0(12) . . ? 
C20 C11 C12 121.8(12) . . ? 
C1 C11 C12 115.1(13) . . ? 
O12 C12 C13 130.6(17) . . ? 
O12 C12 C11 117.1(18) . . ? 
C13 C12 C11 112.0(13) . . ? 
C14 C13 C12 127.6(16) . . ? 
C13 C14 C15 119.3(14) . . ? 
C20 C15 C14 120.2(12) . . ? 
C20 C15 C16 118.2(13) . . ? 
C14 C15 C16 121.5(12) . . ? 
C17 C16 C15 119.7(13) . . ? 
C16 C17 C18 123.1(14) . . ? 
C16 C17 P2 118.6(16) . . ? 
C18 C17 P2 118.2(17) . . ? 
C19 C18 C17 118.5(14) . . ? 
C18 C19 C20 120.5(14) . . ? 
C19 C20 C15 119.8(14) . . ? 
C19 C20 C11 121.3(12) . . ? 
C15 C20 C11 118.8(11) . . ? 
O7 C21 C22 120(2) . . ? 
O8 C22 C21 108(2) . . ? 
O8 C23 C24 116(2) . . ? 
O9 C24 C23 113(2) . . ? 
O9 C25 C26 108(2) . . ? 
O10 C26 C25 127(2) . . ? 
O10 C27 C28 114(2) . . ? 
O11 C28 C27 107(2) . . ? 
O11 C29 C30 110(2) . . ? 
O12 C30 C29 114(2) . . ? 
C36 C35 C44 120.0 . . ? 
C37 C36 C35 120.0 . . ? 
C37 C36 O20 123.4(9) . . ? 
C35 C36 O20 116.6(9) . . ? 
C36 C37 C38 120.0 . . ? 
C36 C37 C37 115.9(10) . 2_554 ? 
C38 C37 C37 124.1(11) . 2_554 ? 
C43 C38 C37 120.0 . . ? 
C43 C38 C39 119.0(10) . . ? 
C37 C38 C39 121.0(10) . . ? 
C44 C43 C38 120.0 . . ? 
C44 C43 C42 120.5(10) . . ? 
C38 C43 C42 119.5(10) . . ? 
C43 C44 C35 120.0 . . ? 
C40 C39 C38 121.3(16) . . ? 
C39 C40 C41 121.4(16) . . ? 
C42 C41 C40 117.1(15) . . ? 
C42 C41 P3 121.8(13) . . ? 
C40 C41 P3 121.1(12) . . ? 
C41 C42 C43 121.4(15) . . ? 
O20 C45 C46 112(2) . . ? 
O21 C46 C45 123(2) . . ? 
O21 C47 C48 124(2) . . ? 
O22 C48 C47 129(3) . . ? 
O22 C49 C49 105.4(16) . 2_554 ? 
 
_diffrn_measured_fraction_theta_max    0.996 
_diffrn_reflns_theta_full              25.04 
_diffrn_measured_fraction_theta_full   0.996 
_refine_diff_density_max    1.307 
_refine_diff_density_min   -1.804 
_refine_diff_density_rms    0.191 
